# Supplementary material
Source: PubMed Central journal article supplement (PMC7790216)

## **Supplemental Material Table of Contents**

### **Supplemental Methods.**

**Supplemental Table 1.** Genetic instruments implemented in the study and their association with each short sleep duration or long sleep duration phenotype identified by Hassan S Dashti et al.

**Supplemental Table 2.** Clinical analysis results with the multivariable models constructed by the complete-case method.

**Supplemental Table 3.** Association between the SNPs included in the genetic instruments and possible major confounders.

**Supplemental Table 4.** Association between CKD stages 3-5 and SNPs included in the genetic instruments.

**Supplemental Table 5.** Leave-one-out analysis results of the two-sample MR analysis.

**Supplemental Figure 1.** General additive model plotting the U-shaped association between self-reported sleep duration and age-sex probabilities of prevalent CKD stages 3-5.

## Supplemental methods

### *Collection of data*

The data from the UK Biobank consortium are available online (URL: <https://www.ukbiobank.ac.uk/data-showcase/>), and the information is identified by field IDs. We used the self-reported duration of sleep in hours to determine sleep exposure (Field ID 1160). Baseline eGFR values were calculated from the information of serum creatinine levels (Field ID 30700) and ethnicity (Field ID 21000). Age was determined by subtracting years of initial assessment center (Field ID 53) visit with years of birth (Field ID 34). Raw data for the following information provided by the UK Biobank were collected: sex (Field ID 31), smoking history (Field ID 20116, missing N = 1687), body mass index (Field ID 21,001, missing N = 1795), waist circumference (Field ID 48, missing N = 954), total cholesterol (Field ID 30690, missing N = 140), HDL cholesterol (Field ID 30760, missing N = 39,456), LDL cholesterol (Field ID 30780, missing N = 916), and self-reported frequency of moderate physical activity per week (Field ID 884, missing N = 23,196). A history of cardiovascular disease was identified by angina, stroke or heart attack diagnosed by a doctor (Field ID 6150, missing N = 1008). Hypertension was determined when people reported a history of treatment with hypertension medication (Field ID 6177 and 6153, missing N = 3342). A history of diabetes mellitus was collected by self-report (Field ID 2443, missing N = 1378). Systolic and diastolic BP were determined by the average of two automated measurements (Field ID 4080 and 4079, missing N = 40,097 and 40,085, respectively), and those with a single missing measurement were considered missing. Self-reported naps during the day (rarely/never, sometimes, usually; Field ID 1190, missing N = 681) and snoring (Field ID 1210, missing N = 32,915) were collected. Spot urine microalbumin-to-creatinine ratios were calculated by dividing the microalbumin level (Field ID 30,500) by the urine creatinine value (Field ID 30,510), scaled to a mg/g unit. Those with < 6.7 mg/L of urine microalbumin, the low detection limit, were considered to have 6.7 mg/L of urine microalbumin (missing N = 13,175).

### *Adjusted variables for the multivariable models*

The first multivariable model was a less stringent model, and we aimed to adjust variables potentially directly associated with sleeping habits: age, sex, smoking history, napping, and snoring. When analyzing incident ESKD outcome, baseline eGFR and urine microalbumin-to-creatinine ratio values were additionally adjusted to reflect baseline kidney function. The second multivariable model was adjusted for all clinical covariates that might be confounders or potential mediators to examine a direct association between sleep duration and outcomes. When analyzing incident ESKD, the number of adjusted variables was reduced to ensure sufficient statistical power, as the outcome was relatively rarer than CKD. Adjustment variables were selected based on clinical importance; we adjusted for age, sex,

previous major cardiovascular disease history (angina, heart attack, or stroke), hypertension, diabetes mellitus, body mass index, smoking history, baseline eGFR, urine microalbumin-to-creatinine ratios, nap habits, and self-reported snoring.

**Supplemental Table 1.** Genetic instruments implemented in the study and their association with each short sleep duration or long sleep duration phenotype identified by Hassan S Dashti et al.

| Phenotype of the genetic instrument | SNP         | Chr:position | Effect allele | Other allele | Effect allele frequency | Info               | OR [95% CI]         | P        |
|-------------------------------------|-------------|--------------|---------------|--------------|-------------------------|--------------------|---------------------|----------|
| Short sleep                         | rs2863957   | 2:114089551  | C             | A            | 0.782                   | 1.00               | 1.056 [1.041-1.071] | 2.60E-18 |
|                                     | rs13107325  | 4:103188709  | T             | C            | 0.075                   | 1.00               | 1.078 [1.055-1.101] | 2.50E-13 |
|                                     | rs1229762   | 7:114218582  | T             | C            | 0.665                   | 1.00               | 1.038 [1.025-1.051] | 1.10E-12 |
|                                     | rs1380703   | 2:57941287   | G             | A            | 0.384                   | 0.96               | 1.036 [1.024-1.049] | 1.60E-11 |
|                                     | rs12963463  | 18:53099093  | C             | T            | 0.299                   | 0.97               | 1.029 [1.016-1.042] | 1.90E-11 |
|                                     | rs75539574  | 2:58871658   | A             | C            | 0.915                   | 0.98               | 1.046 [1.024-1.068] | 8.40E-11 |
|                                     | rs17388803  | 15:48027204  | C             | A            | 0.106                   | 0.96               | 1.054 [1.034-1.074] | 6.50E-10 |
|                                     | rs4585442   | 5:135508381  | G             | A            | 0.311                   | 1.00               | 1.031 [1.019-1.044] | 8.10E-10 |
|                                     | rs1607227   | 11:28808617  | G             | T            | 0.705                   | 0.99               | 1.031 [1.018-1.045] | 1.50E-09 |
|                                     | rs2820313   | 1:201870221  | G             | A            | 0.341                   | 1.00               | 1.031 [1.019-1.043] | 2.30E-09 |
|                                     | rs17005118  | 4:82288564   | A             | G            | 0.265                   | 1.00               | 1.03 [1.017-1.044]  | 2.50E-09 |
|                                     | rs5757675   | 22:39838892  | G             | T            | 0.260                   | 0.99               | 1.035 [1.021-1.048] | 2.70E-09 |
|                                     | rs12567114  | 1:98527951   | G             | A            | 0.725                   | 0.99               | 1.037 [1.024-1.051] | 4.10E-09 |
|                                     | rs142180737 | 6:28344731   | C             | T            | 0.009                   | 0.86               | 1.167 [1.097-1.242] | 4.40E-09 |
|                                     | rs2186122   | 1:66470206   | T             | A            | 0.562                   | 0.99               | 1.024 [1.012-1.036] | 4.80E-09 |
|                                     | rs11763750  | 7:2080114    | G             | A            | 0.814                   | 1.00               | 1.036 [1.02-1.051]  | 5.10E-09 |
|                                     | rs12518468  | 5:7249696    | C             | T            | 0.328                   | 0.99               | 1.032 [1.019-1.044] | 8.50E-09 |
|                                     | rs9367621   | 6:55040290   | T             | A            | 0.431                   | 1.00               | 1.024 [1.013-1.036] | 1.60E-08 |
|                                     | rs3776864   | 5:102327868  | A             | C            | 0.667                   | 1.00               | 1.032 [1.019-1.045] | 1.70E-08 |
|                                     | rs60882754  | 8:52886619   | A             | T            | 0.939                   | 1.00               | 1.057 [1.032-1.083] | 1.80E-08 |
|                                     | rs59779556  | 16:56227965  | T             | G            | 0.554                   | 1.00               | 1.025 [1.013-1.037] | 2.00E-08 |
|                                     | rs2014830   | 3:50172397   | C             | T            | 0.698                   | 0.99               | 1.03 [1.017-1.043]  | 2.70E-08 |
|                                     | rs205024    | 17:11227352  | C             | T            | 0.617                   | 1.00               | 1.031 [1.018-1.043] | 2.70E-08 |
|                                     | rs12661667  | 6:41792545   | T             | C            | 0.263                   | 1.00               | 1.028 [1.015-1.042] | 2.80E-08 |
| rs7939345                           | 11:47980568 | T            | G             | 0.208        | 1.00                    | 1.036 [1.021-1.05] | 4.00E-08            |          |
| rs9321171                           | 6:129848635 | C            | T             | 0.540        | 0.99                    | 1.032 [1.02-1.044] | 4.20E-08            |          |
| rs7524118                           | 1:34736052  | C            | T             | 0.708        | 1.00                    | 1.03 [1.017-1.043] | 4.90E-08            |          |
| Long sleep                          | rs6737318   | 2:114083120  | G             | A            | 0.222                   | 0.99               | 1.079 [1.056-1.103] | 3.40E-13 |
|                                     | rs75458655  | 11:118115331 | T             | C            | 0.023                   | 1.00               | 1.203 [1.136-1.275] | 5.40E-12 |
|                                     | rs17688916  | 17:43778680  | T             | A            | 0.796                   | 0.96467            | 1.074 [1.048-1.1]   | 1.10E-11 |
|                                     | rs17817288  | 16:53807764  | A             | G            | 0.518                   | 1.00               | 1.04 [1.021-1.059]  | 8.90E-09 |
|                                     | rs549961083 | 5:58184093   | T             | C            | 0.001                   | 0.868466           | 1.705 [1.357-2.143] | 9.60E-09 |
|                                     | rs3751046   | 11:122828342 | G             | A            | 0.147                   | 0.99               | 1.072 [1.044-1.099] | 2.00E-08 |
|                                     | rs7534398   | 1:7767464    | A             | T            | 0.201                   | 0.99               | 1.048 [1.024-1.072] | 2.10E-08 |
|                                     | rs10899257  | 11:76415209  | A             | G            | 0.144                   | 1.00               | 1.07 [1.043-1.098]  | 4.60E-08 |

**Reference:** Dashti HS, Jones SE, Wood AR, et al. Genome-wide association study identifies genetic loci for self-reported habitual sleep duration supported by accelerometer-derived estimates. Nat Commun. 2019;10:1100.

**Supplemental Table 2.** Clinical analysis results with the multivariable models constructed by the complete-case method.

| Subjects, outcomes and exposures       | Multivariable model 1 <sup>b</sup> |         | Multivariable model 2 <sup>c</sup> |         |
|----------------------------------------|------------------------------------|---------|------------------------------------|---------|
|                                        | OR or HR (95% CI)                  | P       | Adjusted OR or HR (95% CI)         | P       |
| <b>Total participants<sup>a</sup></b>  |                                    |         |                                    |         |
| CKD stage 3-5                          |                                    |         |                                    |         |
| Short sleep (< 6 hrs)                  | 1.25 (1.15-1.36)                   | < 0.001 | 1.05 (0.94-1.16)                   | 0.42    |
| Long sleep (≥ 9 hrs)                   | 1.51 (1.42-1.60)                   | < 0.001 | 1.33 (1.24-1.44)                   | < 0.001 |
| CKD with eGFR ≥ 45                     |                                    |         |                                    |         |
| Short sleep (< 6 hrs)                  | 1.18 (1.07-1.30)                   | 0.001   | 1.01 (0.90-1.13)                   | 0.88    |
| Long sleep (≥ 9 hrs)                   | 1.42 (1.33-1.52)                   | < 0.001 | 1.27 (1.17-1.37)                   | < 0.001 |
| Incident ESKD                          |                                    |         |                                    |         |
| Short sleep (< 6 hrs)                  | 1.58 (0.94-2.63)                   | 0.08    | 1.51 (0.90-2.53)                   | 0.12    |
| Long sleep (≥ 9 hrs)                   | 1.42 (0.98-2.07)                   | 0.07    | 1.29 (0.89-1.89)                   | 0.18    |
| <b>Male participants<sup>a</sup></b>   |                                    |         |                                    |         |
| CKD stage 3-5                          |                                    |         |                                    |         |
| Short sleep (< 6 hrs)                  | 1.35 (1.19-1.53)                   | < 0.001 | 1.21 (1.04-1.40)                   | 0.01    |
| Long sleep (≥ 9 hrs)                   | 1.52 (1.39-1.65)                   | < 0.001 | 1.32 (1.19-1.46)                   | < 0.001 |
| CKD with eGFR ≥ 45                     |                                    |         |                                    |         |
| Short sleep (< 6 hrs)                  | 1.27 (1.11-1.47)                   | 0.001   | 1.17 (0.99-1.38)                   | 0.07    |
| Long sleep (≥ 9 hrs)                   | 1.43 (1.30-1.57)                   | < 0.001 | 1.28 (1.14-1.44)                   | < 0.001 |
| Incident ESKD                          |                                    |         |                                    |         |
| Short sleep (< 6 hrs)                  | 2.10 (1.18-3.73)                   | 0.01    | 2.02 (1.13-3.62)                   | 0.02    |
| Long sleep (≥ 9 hrs)                   | 1.66 (1.06-2.62)                   | 0.03    | 1.50 (0.95-2.37)                   | 0.08    |
| <b>Female participants<sup>a</sup></b> |                                    |         |                                    |         |
| CKD stage 3-5                          |                                    |         |                                    |         |
| Short sleep (< 6 hrs)                  | 1.18 (1.05-1.32)                   | 0.004   | 0.97 (0.85-1.12)                   | 0.71    |
| Long sleep (≥ 9 hrs)                   | 1.49 (1.38-1.62)                   | < 0.001 | 1.32 (1.19-1.46)                   | < 0.001 |
| CKD with eGFR ≥ 45                     |                                    |         |                                    |         |
| Short sleep (< 6 hrs)                  | 1.12 (0.99-1.26)                   | 0.08    | 0.93 (0.80-1.09)                   | 0.37    |
| Long sleep (≥ 9 hrs)                   | 1.40 (1.28-1.54)                   | < 0.001 | 1.23 (1.10-1.38)                   | < 0.001 |
| Incident ESKD                          |                                    |         |                                    |         |
| Short sleep (< 6 hrs)                  | 0.86 (0.27-2.75)                   | 0.80    | 0.81 (0.25-2.60)                   | 0.72    |
| Long sleep (≥ 9 hrs)                   | 1.17 (0.58-2.32)                   | 0.66    | 1.09 (0.54-2.18)                   | 0.81    |

OR = odds ratio, HR = hazard ratio, CI = confidence interval, CKD = chronic kidney disease, eGFR = estimated glomerular filtration rate, ESKD = end-stage kidney disease

<sup>a</sup>As the analysis was performed by the complete-case method, those with missing covariates were not included. The number of subjects (cases) was 430,998 (10,140 CKD stage 3-5 cases), including 200,232 (5318 CKD stage 3-5 cases) males and 230,766 (4822 CKD stage 3-5 cases) females for multivariable model 1. The number of subjects (cases) was 321,493 (7211 CKD stage 3-5 cases), including 152,370 (3539 CKD stage 3-5 cases) males and 169,123 (3672 CKD stage 3-5 cases) females for multivariable model 2. A total of 530 and 378 subjects with baseline eGFR < 15 mL/min/1.73 m<sup>2</sup> or prevalent ESKD history were not included when analyzing incident ESKD outcome by multivariable models 1 and 2, respectively.

<sup>b</sup>Multivariable model 1 for CKD outcome was adjusted for age, sex, smoking history (nonsmoker, ex-smoker, current-smoker), habitual naps (never/rarely, sometimes, usually), or snoring. When analyzing incident ESKD outcome, baseline eGFR and the urine microalbumin-to-creatinine ratio were added to the model.

<sup>c</sup>Multivariable model 2 for CKD outcome was adjusted for age, sex, body mass index, waist circumference, smoking history (nonsmoker, ex-smoker, current-smoker), frequency of moderate physical activity per week (days), previous history of cardiovascular disease (angina, heart attack or stroke), hypertension, systolic BP, diastolic BP, diabetes mellitus, hemoglobin A1c, total cholesterol, low-density lipoprotein, and high-density lipoprotein levels, as well as self-reported habitual naps (never/rarely, sometimes, usually) or snoring. When analyzing incident ESKD outcome, age, sex, baseline eGFR, urine microalbumin-creatinine ratio, body mass index, smoking history, history of cardiovascular disease, hypertension, diabetes mellitus, and habitual naps or snoring were adjusted for the multivariable model.

**Supplemental Table 3.** Association between the SNPs included in the genetic instruments and possible major confounders.

| Phenotype of the genetic instrument | SNP               | Effect allele | Diabetes mellitus |                |                  | Hypertension  |                |                  | Obesity       |                |                  | Current smoking |                |                  | Lowest P         |
|-------------------------------------|-------------------|---------------|-------------------|----------------|------------------|---------------|----------------|------------------|---------------|----------------|------------------|-----------------|----------------|------------------|------------------|
|                                     |                   |               | Beta              | Standard error | P                | Beta          | Standard error | P                | Beta          | Standard error | P                | Beta            | Standard error | P                |                  |
| Short sleep                         | <b>rs13107325</b> | <b>T</b>      | <b>0.085</b>      | <b>0.021</b>   | <b>5.751E-05</b> | <b>-0.064</b> | <b>0.012</b>   | <b>1.327E-07</b> | <b>0.090</b>  | <b>0.011</b>   | <b>4.289E-17</b> | <b>-0.046</b>   | <b>0.016</b>   | <b>3.399E-03</b> | <b>4.289E-17</b> |
|                                     | <b>rs2820313</b>  | <b>G</b>      | <b>0.024</b>      | <b>0.012</b>   | <b>4.945E-02</b> | <b>0.023</b>  | <b>0.007</b>   | <b>5.143E-04</b> | <b>0.050</b>  | <b>0.006</b>   | <b>1.314E-16</b> | <b>0.026</b>    | <b>0.009</b>   | <b>2.478E-03</b> | <b>1.314E-16</b> |
|                                     | <b>rs2014830</b>  | <b>T</b>      | <b>-0.073</b>     | <b>0.013</b>   | <b>9.305E-09</b> | <b>-0.026</b> | <b>0.007</b>   | <b>1.343E-04</b> | <b>-0.043</b> | <b>0.006</b>   | <b>9.324E-12</b> | <b>-0.013</b>   | <b>0.009</b>   | <b>1.536E-01</b> | <b>9.324E-12</b> |
|                                     | <b>rs11763750</b> | <b>A</b>      | <b>-0.060</b>     | <b>0.015</b>   | <b>6.444E-05</b> | <b>-0.048</b> | <b>0.008</b>   | <b>5.374E-09</b> | <b>-0.045</b> | <b>0.007</b>   | <b>1.500E-09</b> | <b>0.001</b>    | <b>0.011</b>   | <b>8.941E-01</b> | <b>1.500E-09</b> |
|                                     | rs142180737       | C             | 0.126             | 0.061          | 3.795E-02        | -0.007        | 0.035          | 8.316E-01        | 0.157         | 0.031          | 2.720E-07        | 0.081           | 0.043          | 6.245E-02        | 2.720E-07        |
|                                     | rs7939345         | T             | -0.009            | 0.014          | 5.363E-01        | 0.038         | 0.008          | 1.040E-06        | -0.008        | 0.007          | 2.799E-01        | 0.028           | 0.010          | 4.757E-03        | 1.040E-06        |
|                                     | rs3776864         | C             | 0.052             | 0.012          | 1.941E-05        | 0.002         | 0.007          | 7.161E-01        | 0.015         | 0.006          | 1.329E-02        | 0.013           | 0.009          | 1.293E-01        | 1.941E-05        |
|                                     | rs1229762         | C             | -0.022            | 0.012          | 7.028E-02        | -0.012        | 0.007          | 7.869E-02        | 0.000         | 0.006          | 9.612E-01        | -0.036          | 0.009          | 2.933E-05        | 2.933E-05        |
|                                     | rs2186122         | A             | -0.019            | 0.012          | 9.501E-02        | -0.011        | 0.006          | 9.275E-02        | -0.023        | 0.006          | 7.033E-05        | -0.019          | 0.008          | 2.100E-02        | 7.033E-05        |
|                                     | rs1607227         | T             | -0.010            | 0.013          | 4.526E-01        | -0.014        | 0.007          | 3.858E-02        | -0.023        | 0.006          | 2.716E-04        | -0.012          | 0.009          | 1.977E-01        | 2.716E-04        |
|                                     | rs1380703         | G             | -0.005            | 0.012          | 6.626E-01        | 0.015         | 0.007          | 2.159E-02        | 0.019         | 0.006          | 1.161E-03        | -0.006          | 0.009          | 4.627E-01        | 1.161E-03        |
|                                     | rs2863957         | A             | 0.011             | 0.014          | 4.134E-01        | -0.024        | 0.008          | 1.540E-03        | 0.001         | 0.007          | 8.763E-01        | 0.001           | 0.010          | 9.104E-01        | 1.540E-03        |
|                                     | rs75539574        | C             | 0.029             | 0.020          | 1.572E-01        | 0.018         | 0.011          | 1.161E-01        | 0.022         | 0.010          | 3.266E-02        | 0.017           | 0.015          | 2.438E-01        | 3.266E-02        |
|                                     | rs12518468        | C             | -0.025            | 0.012          | 4.235E-02        | -0.005        | 0.007          | 4.708E-01        | -0.006        | 0.006          | 3.131E-01        | 0.017           | 0.009          | 4.591E-02        | 4.235E-02        |
|                                     | rs12661667        | T             | -0.027            | 0.013          | 4.297E-02        | 0.000         | 0.007          | 9.764E-01        | -0.001        | 0.006          | 8.295E-01        | -0.018          | 0.009          | 5.134E-02        | 4.297E-02        |
|                                     | rs5757675         | G             | 0.008             | 0.013          | 5.276E-01        | 0.014         | 0.007          | 4.551E-02        | 0.001         | 0.007          | 8.760E-01        | 0.013           | 0.009          | 1.743E-01        | 4.551E-02        |
|                                     | rs59779556        | G             | -0.019            | 0.012          | 1.002E-01        | 0.001         | 0.006          | 8.487E-01        | -0.010        | 0.006          | 6.928E-02        | 0.012           | 0.008          | 1.282E-01        | 6.928E-02        |
|                                     | rs7524118         | T             | -0.023            | 0.013          | 7.480E-02        | -0.003        | 0.007          | 6.944E-01        | -0.007        | 0.006          | 2.655E-01        | -0.011          | 0.009          | 1.996E-01        | 7.480E-02        |
|                                     | rs12963463        | C             | -0.023            | 0.013          | 7.679E-02        | 0.008         | 0.007          | 2.339E-01        | 0.006         | 0.006          | 3.375E-01        | 0.009           | 0.009          | 3.093E-01        | 7.679E-02        |
|                                     | rs12567114        | A             | -0.022            | 0.013          | 8.955E-02        | -0.001        | 0.007          | 9.085E-01        | -0.003        | 0.006          | 6.534E-01        | -0.009          | 0.009          | 3.514E-01        | 8.955E-02        |
|                                     | rs60882754        | T             | 0.008             | 0.024          | 7.503E-01        | -0.005        | 0.013          | 6.872E-01        | 0.019         | 0.012          | 1.168E-01        | -0.005          | 0.017          | 7.748E-01        | 1.168E-01        |
|                                     | rs17388803        | C             | 0.005             | 0.019          | 8.019E-01        | -0.016        | 0.010          | 1.311E-01        | 0.001         | 0.010          | 8.765E-01        | 0.011           | 0.014          | 4.149E-01        | 1.311E-01        |
|                                     | rs9367621         | T             | -0.016            | 0.012          | 1.630E-01        | 0.004         | 0.006          | 4.956E-01        | -0.007        | 0.006          | 2.031E-01        | 0.001           | 0.008          | 8.943E-01        | 1.630E-01        |
|                                     | rs205024          | T             | -0.015            | 0.012          | 1.958E-01        | 0.003         | 0.006          | 6.203E-01        | -0.002        | 0.006          | 6.764E-01        | 0.011           | 0.008          | 1.805E-01        | 1.805E-01        |
|                                     | rs4585442         | G             | 0.009             | 0.012          | 4.917E-01        | 0.009         | 0.007          | 2.076E-01        | -0.007        | 0.006          | 2.713E-01        | -0.001          | 0.009          | 8.825E-01        | 2.076E-01        |
|                                     | rs9321171         | T             | 0.010             | 0.012          | 3.725E-01        | -0.005        | 0.006          | 4.504E-01        | -0.002        | 0.006          | 6.658E-01        | -0.004          | 0.008          | 6.101E-01        | 3.725E-01        |
| rs17005118                          | A                 | 0.002         | 0.013             | 9.065E-01      | -0.002           | 0.007         | 8.125E-01      | 0.000            | 0.006         | 9.392E-01      | 0.007            | 0.009           | 4.447E-01      | 4.447E-01        |                  |
| Long sleep                          | <b>rs17817288</b> | <b>G</b>      | <b>0.090</b>      | <b>0.011</b>   | <b>6.869E-15</b> | <b>0.040</b>  | <b>0.006</b>   | <b>2.145E-10</b> | <b>0.117</b>  | <b>0.006</b>   | <b>1.109E-93</b> | <b>0.005</b>    | <b>0.008</b>   | <b>5.213E-01</b> | <b>1.109E-93</b> |
|                                     | rs17688916        | A             | -0.005            | 0.014          | 7.549E-01        | -0.035        | 0.008          | 1.076E-05        | 0.009         | 0.007          | 2.318E-01        | -0.023          | 0.010          | 2.806E-02        | 1.076E-05        |
|                                     | rs6737318         | G             | 0.012             | 0.014          | 3.816E-01        | -0.024        | 0.008          | 1.534E-03        | 0.001         | 0.007          | 8.760E-01        | 0.001           | 0.010          | 9.096E-01        | 1.534E-03        |
|                                     | rs10899257        | A             | -0.044            | 0.017          | 8.623E-03        | 0.011         | 0.009          | 2.334E-01        | -0.004        | 0.008          | 5.885E-01        | -0.004          | 0.012          | 7.550E-01        | 8.623E-03        |
|                                     | rs75458655        | T             | 0.020             | 0.038          | 6.109E-01        | 0.026         | 0.021          | 2.199E-01        | 0.006         | 0.019          | 7.368E-01        | 0.042           | 0.027          | 1.199E-01        | 1.199E-01        |
|                                     | rs549961083       | T             | 0.145             | 0.152          | 3.413E-01        | 0.106         | 0.086          | 2.182E-01        | -0.070        | 0.081          | 3.910E-01        | 0.032           | 0.111          | 7.763E-01        | 2.182E-01        |
|                                     | rs7534398         | A             | 0.000             | 0.014          | 9.966E-01        | 0.004         | 0.008          | 5.738E-01        | 0.008         | 0.007          | 2.560E-01        | -0.001          | 0.010          | 8.888E-01        | 2.560E-01        |
| rs3751046                           | G                 | 0.017         | 0.016             | 2.896E-01      | 0.001            | 0.009         | 8.865E-01      | 0.000            | 0.008         | 9.614E-01      | 0.012            | 0.012           | 2.776E-01      | 2.776E-01        |                  |

GWAS was performed with the SNPs included in the genetic instrument for diabetes, hypertension, obesity, and current smoking by logistic regression analysis adjusted for age, sex, and the first 20 principal components of the genetic information. The SNPs that reached genome-wide significance ( $P < 5 \times 10^{-8}$ ) were excluded from the genetic instrument in the sensitivity analysis, and the SNPs are highlighted in color.

**Supplemental Table 4.** Association between CKD stages 3-5 and SNPs included in the genetic instruments.

| Phenotype of the genetic instrument | SNP         | Effect allele | Other allele | Beta   | Standard error | P     |
|-------------------------------------|-------------|---------------|--------------|--------|----------------|-------|
| Short sleep                         | rs7524118   | T             | C            | -0.022 | 0.018          | 0.218 |
|                                     | rs2186122   | A             | T            | -0.014 | 0.017          | 0.399 |
|                                     | rs12567114  | A             | G            | -0.014 | 0.019          | 0.455 |
|                                     | rs2820313   | G             | A            | -0.002 | 0.017          | 0.887 |
|                                     | rs1380703   | G             | A            | 0.010  | 0.017          | 0.568 |
|                                     | rs75539574  | C             | A            | -0.007 | 0.030          | 0.826 |
|                                     | rs2863957   | A             | C            | -0.002 | 0.020          | 0.929 |
|                                     | rs2014830   | T             | C            | -0.035 | 0.018          | 0.052 |
|                                     | rs17005118  | A             | G            | -0.034 | 0.019          | 0.072 |
|                                     | rs13107325  | T             | C            | 0.024  | 0.031          | 0.434 |
|                                     | rs12518468  | C             | T            | -0.019 | 0.018          | 0.280 |
|                                     | rs3776864   | C             | A            | -0.019 | 0.018          | 0.289 |
|                                     | rs4585442   | G             | A            | 0.018  | 0.018          | 0.318 |
|                                     | rs142180737 | C             | T            | 0.058  | 0.090          | 0.522 |
|                                     | rs12661667  | T             | C            | 0.007  | 0.019          | 0.719 |
|                                     | rs9367621   | T             | A            | 0.025  | 0.017          | 0.131 |
|                                     | rs9321171   | T             | C            | 0.024  | 0.017          | 0.142 |
|                                     | rs11763750  | A             | G            | 0.013  | 0.021          | 0.550 |
|                                     | rs1229762   | C             | T            | -0.013 | 0.017          | 0.453 |
|                                     | rs60882754  | T             | A            | -0.026 | 0.035          | 0.461 |
|                                     | rs1607227   | T             | G            | -0.024 | 0.018          | 0.182 |
|                                     | rs7939345   | T             | G            | 0.036  | 0.020          | 0.076 |
|                                     | rs17388803  | C             | A            | 0.052  | 0.027          | 0.052 |
|                                     | rs59779556  | G             | T            | -0.034 | 0.017          | 0.040 |
|                                     | rs205024    | T             | C            | -0.031 | 0.017          | 0.068 |
|                                     | rs12963463  | C             | T            | 0.011  | 0.018          | 0.539 |
|                                     | rs5757675   | G             | T            | 0.001  | 0.019          | 0.963 |
|                                     | Long sleep  | rs10899257    | A            | G      | 0.051          | 0.023 |
| rs17688916                          |             | A             | T            | 0.011  | 0.021          | 0.593 |
| rs17817288                          |             | G             | A            | 0.006  | 0.016          | 0.720 |
| rs3751046                           |             | G             | A            | 0.003  | 0.023          | 0.895 |
| rs549961083                         |             | T             | C            | -0.053 | 0.236          | 0.823 |
| rs6737318                           |             | G             | A            | -0.004 | 0.020          | 0.836 |
| rs7534398                           |             | A             | T            | 0.012  | 0.021          | 0.565 |
| rs75458655                          |             | T             | C            | 0.015  | 0.055          | 0.783 |

GWAS was performed with the SNPs included in the genetic instrument for CKD stage 3-5 outcome, adjusted for age, sex, and the first 20 principal components of the genetic information.

**Supplemental Table 5.** Leave-one-out analysis results of the two-sample MR analysis.

| Phenotype of the genetic instrument | SNP         | Inverse variance weighted |                |       | MR-Egger |                |       |
|-------------------------------------|-------------|---------------------------|----------------|-------|----------|----------------|-------|
|                                     |             | Beta                      | Standard error | P     | Beta     | Standard error | P     |
| Short sleep                         | rs11763750  | 0.093                     | 0.045          | 0.037 | 0.550    | 0.219          | 0.020 |
|                                     | rs1229762   | 0.101                     | 0.045          | 0.025 | 0.558    | 0.219          | 0.018 |
|                                     | rs12518468  | 0.118                     | 0.045          | 0.009 | 0.530    | 0.206          | 0.017 |
|                                     | rs12567114  | 0.094                     | 0.045          | 0.037 | 0.549    | 0.219          | 0.020 |
|                                     | rs12661667  | 0.114                     | 0.044          | 0.010 | 0.506    | 0.212          | 0.026 |
|                                     | rs12963463  | 0.097                     | 0.045          | 0.029 | 0.560    | 0.220          | 0.018 |
|                                     | rs13107325  | 0.083                     | 0.045          | 0.064 | 0.530    | 0.244          | 0.041 |
|                                     | rs1380703   | 0.097                     | 0.045          | 0.032 | 0.551    | 0.219          | 0.020 |
|                                     | rs142180737 | 0.073                     | 0.045          | 0.102 | 0.365    | 0.243          | 0.147 |
|                                     | rs1607227   | 0.093                     | 0.045          | 0.036 | 0.562    | 0.218          | 0.017 |
|                                     | rs17005118  | 0.095                     | 0.045          | 0.033 | 0.562    | 0.219          | 0.018 |
|                                     | rs17388803  | 0.099                     | 0.045          | 0.028 | 0.604    | 0.226          | 0.014 |
|                                     | rs2014830   | 0.119                     | 0.045          | 0.008 | 0.510    | 0.205          | 0.021 |
|                                     | rs205024    | 0.105                     | 0.045          | 0.019 | 0.544    | 0.219          | 0.021 |
|                                     | rs2820313   | 0.094                     | 0.045          | 0.035 | 0.561    | 0.218          | 0.018 |
|                                     | rs2863957   | 0.091                     | 0.046          | 0.049 | 0.622    | 0.244          | 0.018 |
|                                     | rs3776864   | 0.080                     | 0.045          | 0.074 | 0.574    | 0.204          | 0.010 |
|                                     | rs4585442   | 0.092                     | 0.045          | 0.040 | 0.565    | 0.217          | 0.016 |
|                                     | rs5757675   | 0.097                     | 0.045          | 0.029 | 0.552    | 0.219          | 0.020 |
|                                     | rs59779556  | 0.095                     | 0.044          | 0.032 | 0.593    | 0.222          | 0.014 |
|                                     | rs60882754  | 0.099                     | 0.044          | 0.026 | 0.592    | 0.223          | 0.015 |
|                                     | rs7524118   | 0.103                     | 0.045          | 0.021 | 0.546    | 0.220          | 0.021 |
|                                     | rs75539574  | 0.105                     | 0.044          | 0.018 | 0.591    | 0.215          | 0.012 |
|                                     | rs7939345   | 0.070                     | 0.045          | 0.115 | 0.537    | 0.187          | 0.009 |
| rs9321171                           | 0.102       | 0.045                     | 0.024          | 0.550 | 0.219    | 0.020          |       |
| Long sleep                          | rs10899257  | -0.058                    | 0.055          | 0.287 | -0.028   | 0.154          | 0.864 |
|                                     | rs17688916  | -0.053                    | 0.055          | 0.333 | -0.019   | 0.155          | 0.906 |
|                                     | rs17817288  | -0.054                    | 0.053          | 0.313 | -0.093   | 0.193          | 0.654 |
|                                     | rs3751046   | -0.064                    | 0.055          | 0.241 | -0.033   | 0.154          | 0.840 |
|                                     | rs6737318   | -0.046                    | 0.059          | 0.431 | 0.000    | 0.162          | 0.999 |
|                                     | rs7534398   | -0.081                    | 0.053          | 0.122 | 0.034    | 0.159          | 0.840 |
|                                     | rs75458655  | -0.076                    | 0.054          | 0.160 | -0.154   | 0.220          | 0.523 |

SNP = single nucleotide polymorphism.

The two-sample MR analysis was repeated by omitting each SNP from the genetic instrument for exposure by the fixed-effects inverse variance weighted method or by MR-Egger regression.



**Supplemental Figure 1.** General additive model plotting the U-shaped association between self-reported sleep duration and age-sex probabilities of prevalent CKD stages 3-5.

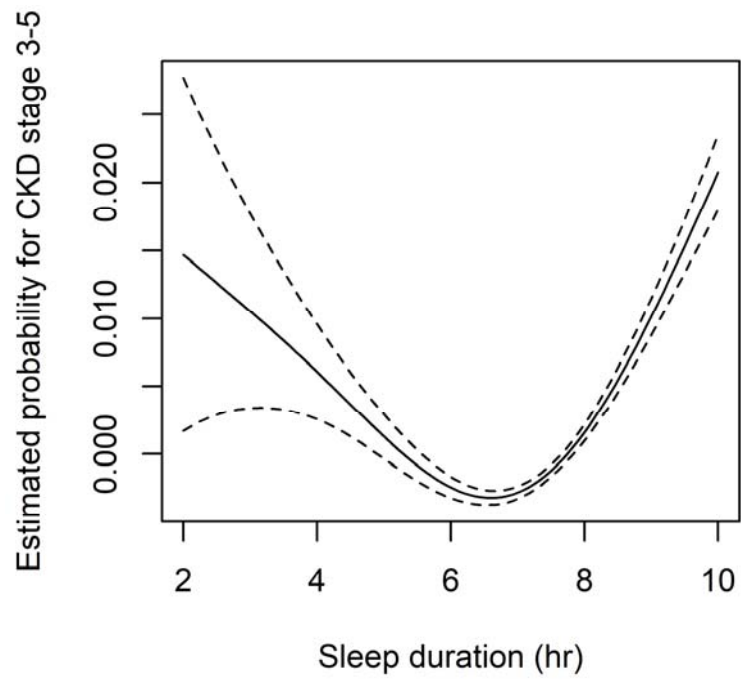

Supplement: ASN.2020050666SupplementaryData.pdf [file ASN.2020050666SupplementaryData.pdf]
